# Supplementary material for: Folate Conjugated Polyethylene Glycol Probe for Tumor-Targeted Drug Delivery of 5-Fluorouracil
Source: MDPI journal article supplement (doi:10.3390/molecules27061780), 2022-03-09
Supplement: s1 [file s1]

## Supplementary data

### Folate Conjugated Polyethylene Glycol Probe for Tumor-Targeted Drug Delivery of 5-Fluorouracil

Shabnam Sarwar <sup>1\*</sup>, Muhammad Abdul Qadir <sup>1</sup>, Rima D. Alharthy <sup>2\*</sup>, Mahmood Ahmed <sup>3\*</sup>, Saghir Ahmad <sup>1</sup>, Michiel Vanmeert <sup>4</sup>, Muhammad Usman Mirza <sup>4</sup>, Abdul Hameed <sup>5</sup>

<sup>1</sup> School of Chemistry, University of the Punjab, Lahore-54590, Pakistan

<sup>2</sup> Chemistry Department, Faculty of Science and Arts, King Abdulaziz University, Rabigh 21911, Saudi Arabia

<sup>3</sup> Department of Chemistry, Division of Science and Technology, University of Education, College Road, Lahore-Pakistan

<sup>4</sup> REGA Institute for Medical Research, Medicinal Chemistry Herenstraat 49, 3000 Leuven Belgium

<sup>6</sup> Department of Chemistry, University of Sahiwal, Sahiwal-Pakistan

### Running title: Folic acid assisted tumor-targeted delivery of 5- fluorouracil

To whom correspondence should be addressed

---

Shabnam Sarwar, PhD

[shabnamshahzadkhan@gmail.com](mailto:shabnamshahzadkhan@gmail.com)

Mahmood Ahmad, PhD

[mahmoodresearchscholar@gmail.com](mailto:mahmoodresearchscholar@gmail.com), [mahmood.ahmed@ue.edu.pk](mailto:mahmood.ahmed@ue.edu.pk)

Rima D. Alharthy, PhD

[iaaalharte@kau.edu.sa](mailto:iaaalharte@kau.edu.sa)

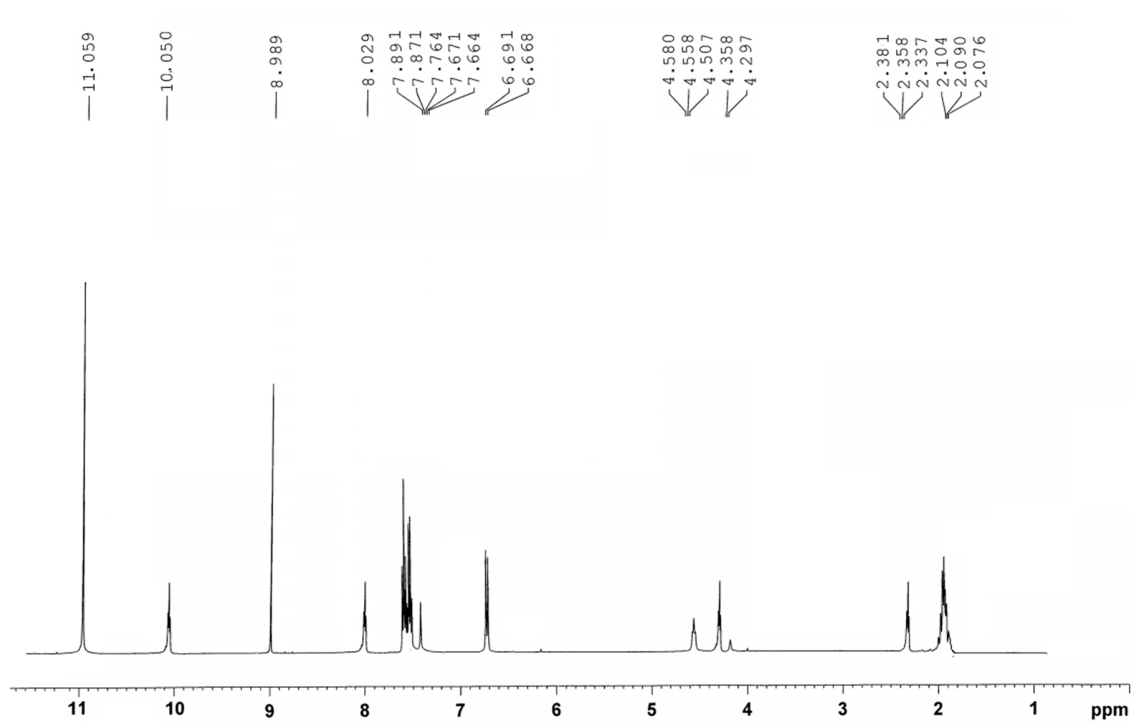

**Fig. S1  $^1\text{H}$ NMR: FA-PEG-NH<sub>2</sub>**

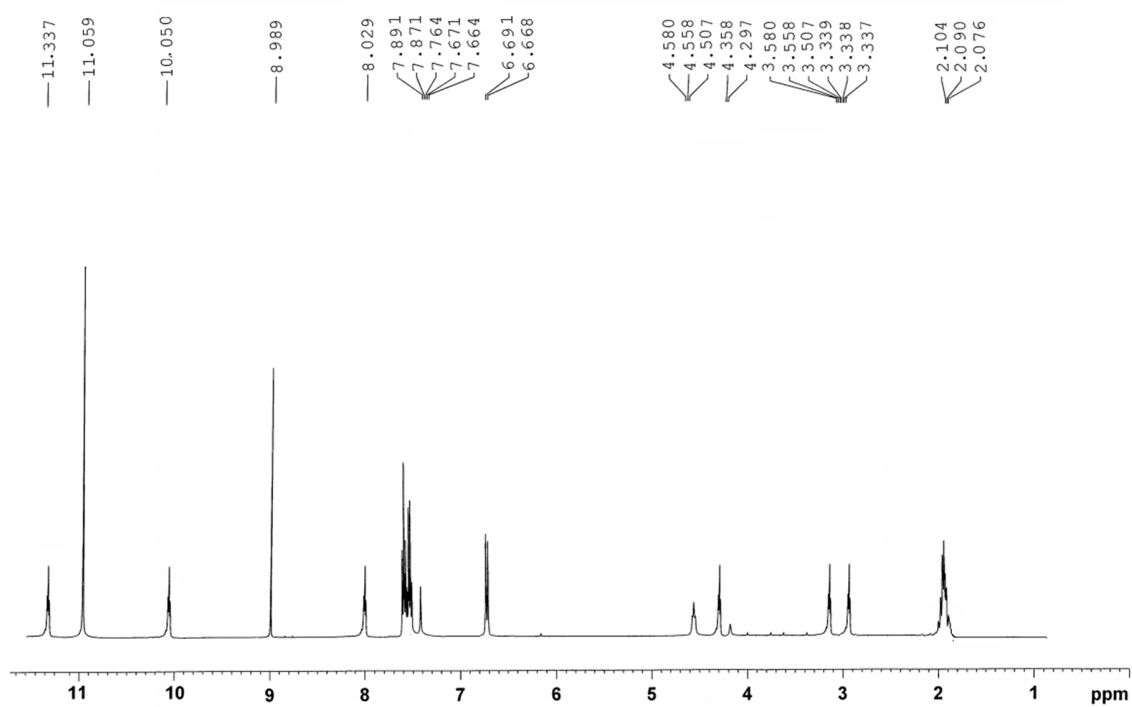

**Figure S2  $^1\text{H}$ NMR: FA-PEG-5-FU**
